# Supplementary material for: Methyl nitrate energetic compounds based on bicyclic scaffolds of furazan–isofurazan (isoxazole): syntheses, crystal structures and detonation performances
Source: Royal Society of Chemistry journal article supplement (doi:10.1039/d2ra00215a), 2022-01-01
Supplement: d2ra00215a1.pdf [file d2ra00215a1.pdf]

## Supplementary Material

# Methyl Nitrate Energetic Compounds based on Bicyclic Scaffolds of Furazan-Isosfurazan (isoxazole): Syntheses, Crystal structures and Detonation Performances

Qi Xue,<sup>a,b</sup> Fuqiang Bi,<sup>a,b</sup> Yifen Luo,<sup>a,b</sup> Jiarong Zhang,<sup>a,b</sup> Kaidi Yang,<sup>a,b</sup> Bozhou Wang,<sup>\*a,b</sup> and Ganglin Xue<sup>\*c</sup>

a. Xi'an Modern Chemistry Research Institute, Xi'an, 710065, China, E-mail: wbz600@163.com

b. State Key Laboratory of Fluorine & Nitrogen Chemicals, Xi'an, 710065, China

c. College of Chemistry & Materials Science, Key Laboratory of Synthetic and Natural Functional Molecule Chemistry, Northwest University, Xi'an, 710127, China, E-mail: xglin707@163.com

**Table S1.** Crystallographic parameters data for compound **1d** and **2e**

| Compound                               | 1d                                                          | 2e                                                          |
|----------------------------------------|-------------------------------------------------------------|-------------------------------------------------------------|
| Formula                                | C <sub>6</sub> H <sub>7</sub> N <sub>7</sub> O <sub>7</sub> | C <sub>5</sub> H <sub>6</sub> N <sub>8</sub> O <sub>7</sub> |
| Molecular mass                         | 289.19                                                      | 290.18                                                      |
| Crystal system                         | Monoclinic                                                  | monoclinic                                                  |
| Space group                            | <i>P</i> 2 <sub>1</sub>                                     | <i>P</i> 2 <sub>1</sub> / <i>c</i>                          |
| a/Å                                    | 7.1382(9)                                                   | 15.3710(8)                                                  |
| b/Å                                    | 5.2760(7)                                                   | 9.1833(4)                                                   |
| c/Å                                    | 15.469(2)                                                   | 7.7679(4)                                                   |
| α/°                                    | 90                                                          | 90                                                          |
| β/°                                    | 91.730(5)                                                   | 91.405(4)                                                   |
| γ/°                                    | 90                                                          | 90                                                          |
| Volume/Å <sup>3</sup>                  | 582.33(13)                                                  | 1096.16(9)                                                  |
| Z                                      | 2                                                           | 4                                                           |
| Temperature(K)                         | 180(2)                                                      | 150.0                                                       |
| ρ <sub>calc</sub> (g/cm <sup>3</sup> ) | 1.649                                                       | 1.758                                                       |
| μ/mm <sup>-1</sup>                     | 0.848                                                       | 1.447                                                       |
| F(000)                                 | 296.0                                                       | 592.0                                                       |
| Crystal size                           | 0.2 × 0.15 × 0.11                                           | 0.2 × 0.15 × 0.1                                            |
| Reflections collected                  | 5859                                                        | 7421                                                        |
| Radiation                              | Ga Kα (λ = 0.134139)                                        | Cu Kα (λ = 1.54178)                                         |
| Goodness-of-fit on F <sup>2</sup>      | 1.116                                                       | 1.101                                                       |
| Final R indexes [I >= 2σ (I)]          | R <sub>1</sub> = 0.0832, wR <sub>2</sub> = 0.2490           | R <sub>1</sub> = 0.0905, wR <sub>2</sub> = 0.2345           |
| Final R indexes [all data]             | R <sub>1</sub> = 0.0877, wR <sub>2</sub> = 0.2533           | R <sub>1</sub> = 0.1006, wR <sub>2</sub> = 0.2469           |
| Data/restraints/parameters             | 2095/11/198                                                 | 2161/3/185                                                  |

**Table S2.** Bond lengths for compound **1d**.

| Atom | Atom | Length/Å | Atom | Atom | Length/Å |
|------|------|----------|------|------|----------|
| C1   | N3   | 1.304(8) | C6   | O5   | 1.447(8) |
| C1   | N2   | 1.373(7) | N1   | O2   | 1.249(6) |
| C1   | C2   | 1.442(8) | N1   | O1   | 1.269(6) |
| C2   | N4   | 1.297(8) | N1   | N2   | 1.317(6) |
| C2   | C3   | 1.472(8) | N3   | O3   | 1.427(7) |
| C3   | N5   | 1.308(8) | N4   | O3   | 1.373(7) |
| C3   | C4   | 1.407(8) | N5   | O4   | 1.399(6) |
| C4   | C5   | 1.321(9) | N6   | O6   | 1.201(9) |
| C5   | O4   | 1.377(8) | N6   | O7   | 1.213(9) |

**Table S3.** Bond angles for compound **1d**.

| Atom | Atom | Atom | Angle/°  | Atom | Atom | Atom | Angle/°  |
|------|------|------|----------|------|------|------|----------|
| N3   | C1   | N2   | 131.8(5) | O2   | N1   | O1   | 119.8(4) |
| N3   | C1   | C2   | 108.4(5) | O2   | N1   | N2   | 124.5(5) |
| N2   | C1   | C2   | 119.8(5) | O1   | N1   | N2   | 115.7(4) |
| N4   | C2   | C1   | 109.7(5) | N1   | N2   | C1   | 115.6(4) |
| N4   | C2   | C3   | 119.6(5) | C1   | N3   | O3   | 105.6(5) |
| C1   | C2   | C3   | 130.8(5) | C2   | N4   | O3   | 106.6(5) |
| N5   | C3   | C4   | 112.0(5) | C3   | N5   | O4   | 105.2(5) |
| N5   | C3   | C2   | 121.8(5) | O6   | N6   | O7   | 130.0(7) |
| C4   | C3   | C2   | 126.3(5) | O6   | N6   | O5   | 118.2(6) |
| C5   | C4   | C3   | 105.3(6) | O7   | N6   | O5   | 111.8(7) |
| C4   | C5   | O4   | 109.4(5) | N4   | O3   | N3   | 109.7(4) |
| C4   | C5   | C6   | 136.0(6) | C5   | O4   | N5   | 108.1(5) |
| O4   | C5   | C6   | 114.6(6) | N6   | O5   | C6   | 114.9(5) |
| O5   | C6   | C5   | 110.7(5) |      |      |      |          |

**Table S4.** Dihedral angles for compound **1d**.

| Atom | Atom | Atom | Atom | Angle/°        | Atom | Atom | Atom | Atom | Angle/°        |
|------|------|------|------|----------------|------|------|------|------|----------------|
| C1   | C2   | C3   | C4   | 167.944 (579)  | C2   | C1   | N2   | N1   | -173.473 (461) |
| C1   | N2   | N1   | O1   | -176.933 (445) | O4   | N5   | C3   | C2   | -178.591 (476) |
| C4   | C5   | C6   | O5   | 105.398 (870)  | C6   | C5   | C4   | C3   | 178.687 (717)  |
| C5   | C6   | O5   | N6   | -80.092 (669)  | C6   | O5   | N6   | O7   | 177.559 (647)  |

**Table S5.** Hydrogen bonds for compound **1d**.

| Donor atom | Accept atom | Length/Å | Angle/°       |
|------------|-------------|----------|---------------|
| N7-H6      | O3          | 3.353    | 108.324 (142) |
| N7-H6      | N1          | 3.051    | 108.149 (130) |
| N7-H7      | N1          | 2.995    | 169.925 (234) |
| N7-H8      | N5          | 2.595    | 115.475 (251) |
| N7-H6      | N3          | 2.281    | 103.966 (143) |
| N7-H6      | O2          | 2.193    | 98.846 (157)  |
| N7-H7      | O3          | 2.684    | 112.926 (357) |
| C6-H6A     | O5          | 3.215    | 156.366 (221) |
| C6-H6A     | O3          | 3.021    | 122.229 (380) |
| C6-H6B     | O4          | 2.752    | 149.719 (431) |
| C6-H6A     | N4          | 2.512    | 148.970 (403) |

**Table S6.** Bond lengths for compound **2e**.

| Atom | Atom | Length/Å | Atom | Atom | Length/Å |
|------|------|----------|------|------|----------|
| O7   | N7   | 1.2715   | N7   | N6   | 1.3105   |
| O4   | C2   | 1.3609   | N6   | C5   | 1.3815   |
| O4   | C3   | 1.3561   | N5   | C5   | 1.3059   |
| O5   | N5   | 1.3986   | N4   | C4   | 1.2952   |
| O5   | N4   | 1.3657   | N3   | N2   | 1.4005   |
| O3   | N1   | 1.4103   | N3   | C3   | 1.2877   |
| O3   | C1   | 1.4557   | N2   | C2   | 1.2763   |
| O2   | N1   | 1.2004   | C4   | C5   | 1.4412   |
| O6   | N7   | 1.2466   | C4   | C3   | 1.4543   |
| O1   | N1   | 1.1982   | C2   | C1   | 1.4850   |

**Table S7.** Dihedral angles for compound **2e**.

| Atom | Atom | Atom | Atom | Angle/°      | Atom | Atom | Atom | Atom | Angle/°     |
|------|------|------|------|--------------|------|------|------|------|-------------|
| C5   | N6   | N7   | O6   | 2.025 (6)    | O4   | C3   | C4   | C5   | 170.362 (3) |
| C5   | N5   | O5   | N4   | 1.614 (4)    | C3   | O4   | C2   | C1   | 176.690 (3) |
| O4   | C2   | C1   | O3   | 72.788 (4)   | C2   | C1   | O3   | N1   | 170.315 (4) |
| N2   | O2   | C1   | O3   | -111.138 (4) |      |      |      |      |             |

**Table S8.** Bond angles for compound **2e**.

| Atom | Atom | Atom | Angle/° | Atom | Atom | Atom | Angle/° |
|------|------|------|---------|------|------|------|---------|
| C3   | O4   | C2   | 102.0   | N4   | C4   | C5   | 109.9   |
| N4   | O5   | N5   | 111.6   | N4   | C4   | C3   | 121.3   |
| N1   | O3   | C1   | 112.0   | C5   | C4   | C3   | 128.7   |
| O7   | N7   | N6   | 114.8   | N6   | C5   | C4   | 120.4   |
| O6   | N7   | O7   | 120.1   | N5   | C5   | N6   | 131.5   |
| O6   | N7   | N6   | 125.1   | N5   | C5   | C4   | 108.1   |
| N7   | N6   | C5   | 116.1   | O4   | C2   | C1   | 119.3   |
| O2   | N1   | O3   | 117.3   | N2   | C2   | O4   | 113.0   |
| O1   | N1   | O3   | 112.7   | N2   | C2   | C1   | 127.6   |
| O1   | N1   | O2   | 130.0   | O4   | C3   | C4   | 118.2   |
| C5   | N5   | O5   | 105.0   | N3   | C3   | O4   | 112.7   |
| C4   | N4   | O5   | 105.3   | N3   | C3   | C4   | 129.0   |
| C3   | N3   | N2   | 106.0   | O3   | C1   | C2   | 105.9   |
| C2   | N2   | N3   | 106.2   |      |      |      |         |

**Table S9.** Hydrogen bonds for compound **2e**.

| Donor atom | Accept atom | Length/Å | Angle/°     |
|------------|-------------|----------|-------------|
| N8-H3      | N2          | 3.087    | 126.613 (4) |
| N8-H4      | O6          | 2.760    | 124.258 (3) |
| N8-H5      | N7          | 2.726    | 132.993 (4) |
| N8-H4      | N7          | 2.718    | 150.521 (3) |
| N8-H2      | N5          | 2.366    | 150.480 (4) |
| N8-H2      | N3          | 2.239    | 157.061 (3) |
| N8-H5      | O7          | 2.127    | 135.438 (4) |
| C1-H1B     | O1          | 2.911    | 152.932 (4) |
| C1-H1A     | N4          | 2.772    | 162.022 (6) |

**Table S10.** Kinetic parameters and enthalpies of thermal decomposition of **1d**, **2e** and **3e**<sup>a</sup>.

|           | $\beta_i$<br>(K min <sup>-1</sup> ) | $T_p$<br>(K) | $E_k$<br>(kJ mol <sup>-1</sup> ) | r     | log $A_k$<br>(s <sup>-1</sup> ) |
|-----------|-------------------------------------|--------------|----------------------------------|-------|---------------------------------|
| <b>1d</b> | 2.5                                 | 405.81       |                                  |       |                                 |
|           | 5                                   | 412.27       |                                  |       |                                 |
|           | 10                                  | 417.91       | 148.5712                         | 0.997 | 15.51                           |
|           | 15                                  | 422.51       |                                  |       |                                 |
|           | 2.5                                 | 399.97       |                                  |       |                                 |
| <b>3e</b> | 5                                   | 400.51       |                                  |       |                                 |
|           | 10                                  | 406.11       | 148.9869                         | 0.992 | 16.12                           |
|           | 15                                  | 411.03       |                                  |       |                                 |
|           | 2.5                                 | 397.97       |                                  |       |                                 |
|           | 5                                   | 402.51       |                                  |       |                                 |
| <b>2e</b> | 10                                  | 406.74       | 186.907                          | 0.996 | 21.87                           |
|           | 15                                  | 410.34       |                                  |       |                                 |

<sup>a</sup>  $E_k$  is the apparent activation energy; r is the liner correlation coefficient;  $A_k$  is pre-exponential factor.

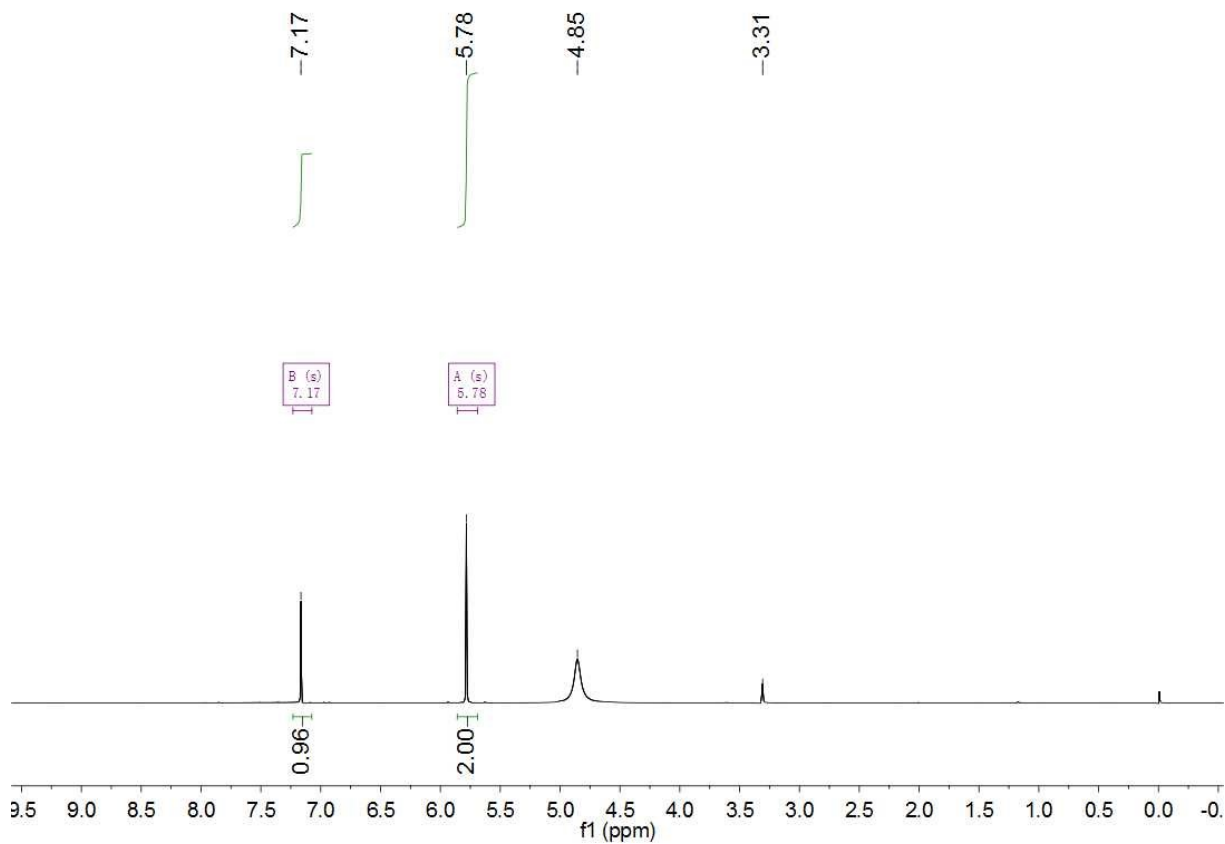**Figure S1.** <sup>1</sup>H NMR (CD<sub>3</sub>OD-*d*<sub>6</sub>, 500 MHz) data of compound **1d**.

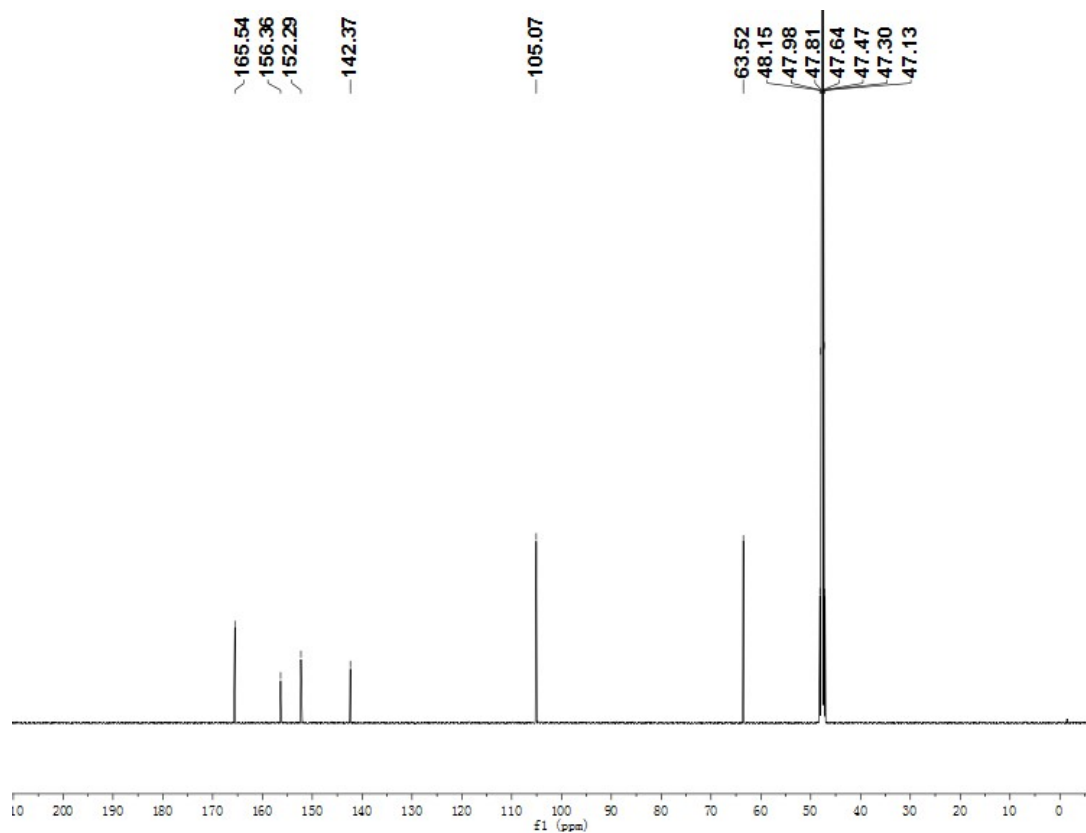

**Figure S2.**  $^{13}\text{C}$  NMR (CD<sub>3</sub>OD-*d*<sub>6</sub>, 125 MHz) data of compound **1d**.

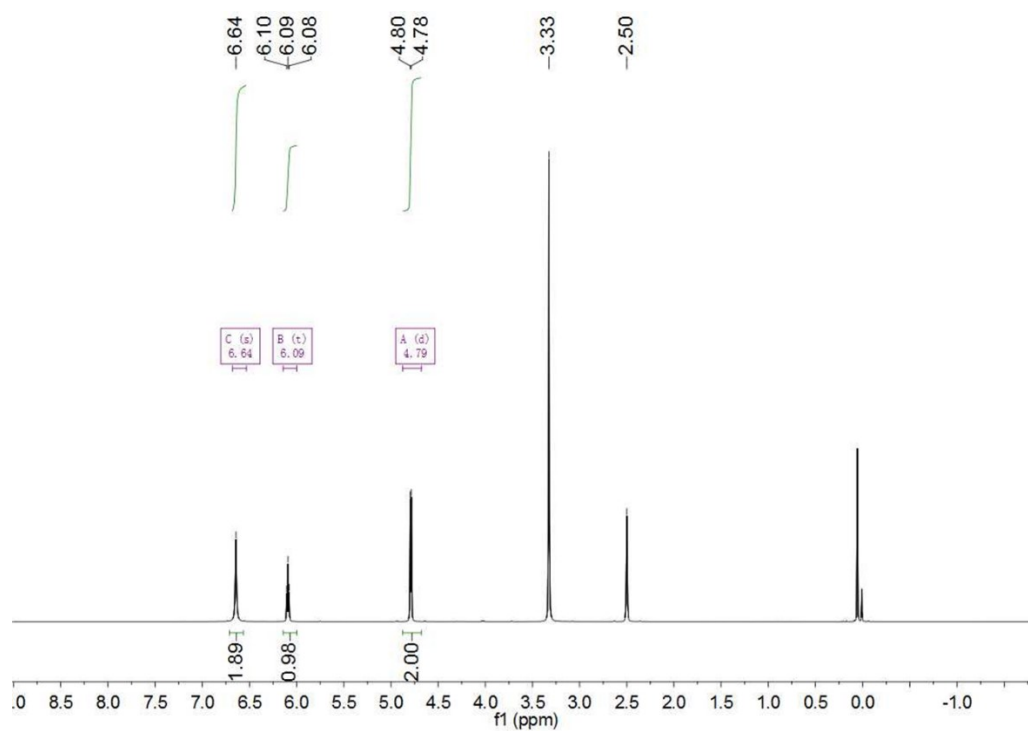

**Figure S3.**  $^1\text{H}$  NMR (DMSO-*d*<sub>6</sub>, 500 MHz) data of compound **2b**.

20210712-DMACO-HCl-K2CO3--2  
Instrument Bruker-AV500  
Operator MCRI NMR  
Group Number 1SU0  
TEST No 2021N9285  
50% 298K Tested by:zlh Approved by:nmc  
DMACO-HCl-K2CO3--2 10mg/0.6ml 1SU0-XQ  
204-BBFO-C DMSO (F:\nmr-data\2021) 204NMR 27

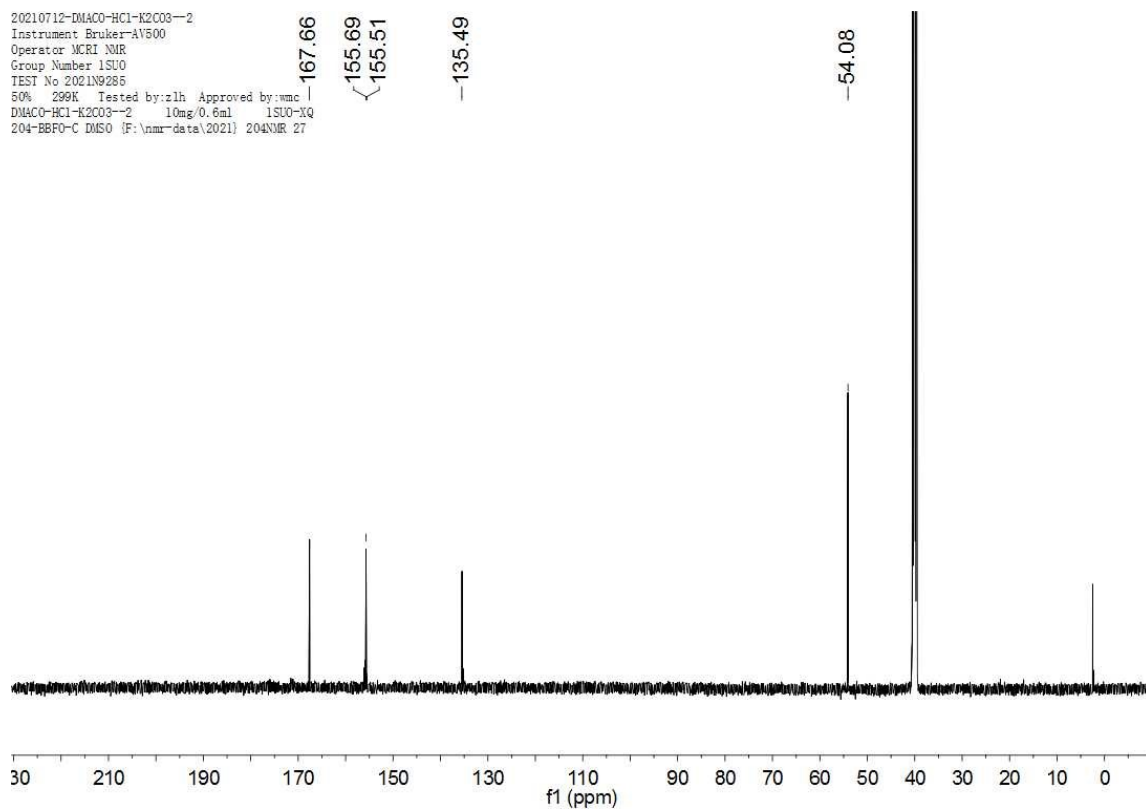

**Figure S4.**  $^{13}\text{C}$  NMR (DMSO- $d_6$ , 125 MHz) data of compound **2b**.

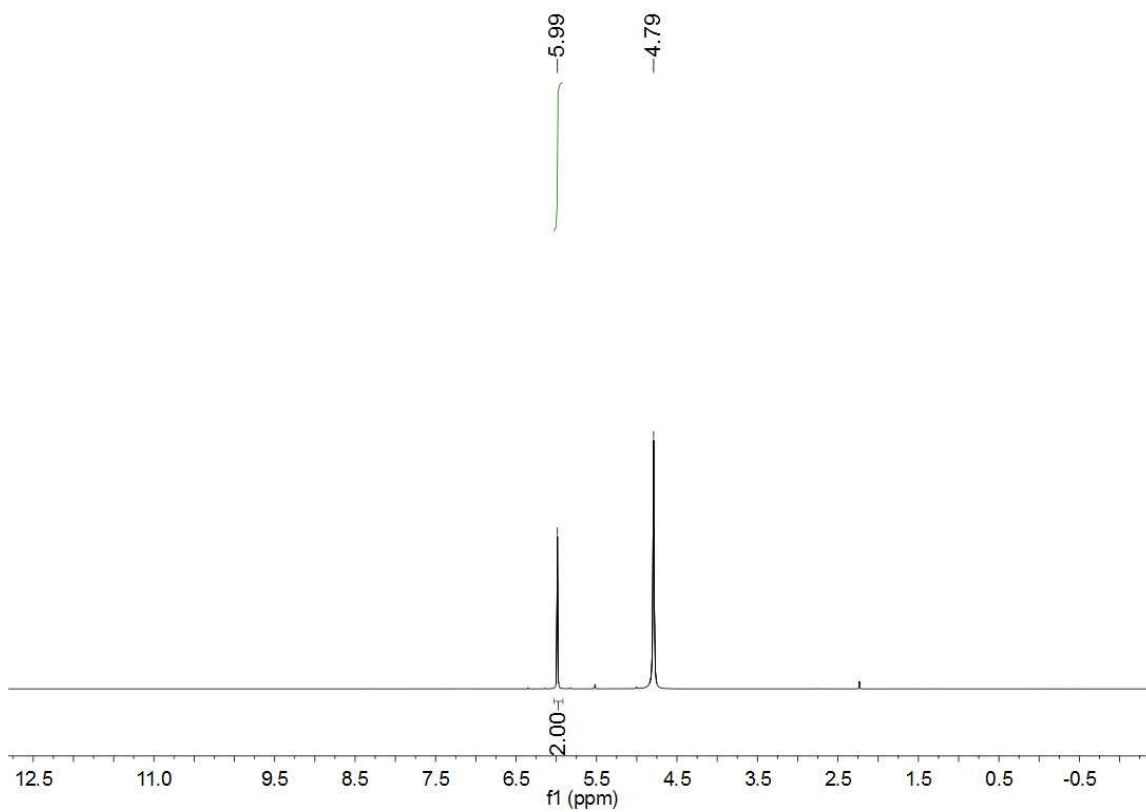

**Figure S5.**  $^1\text{H}$  NMR (D $_2$ O, 500 MHz) data of compound **2e**.

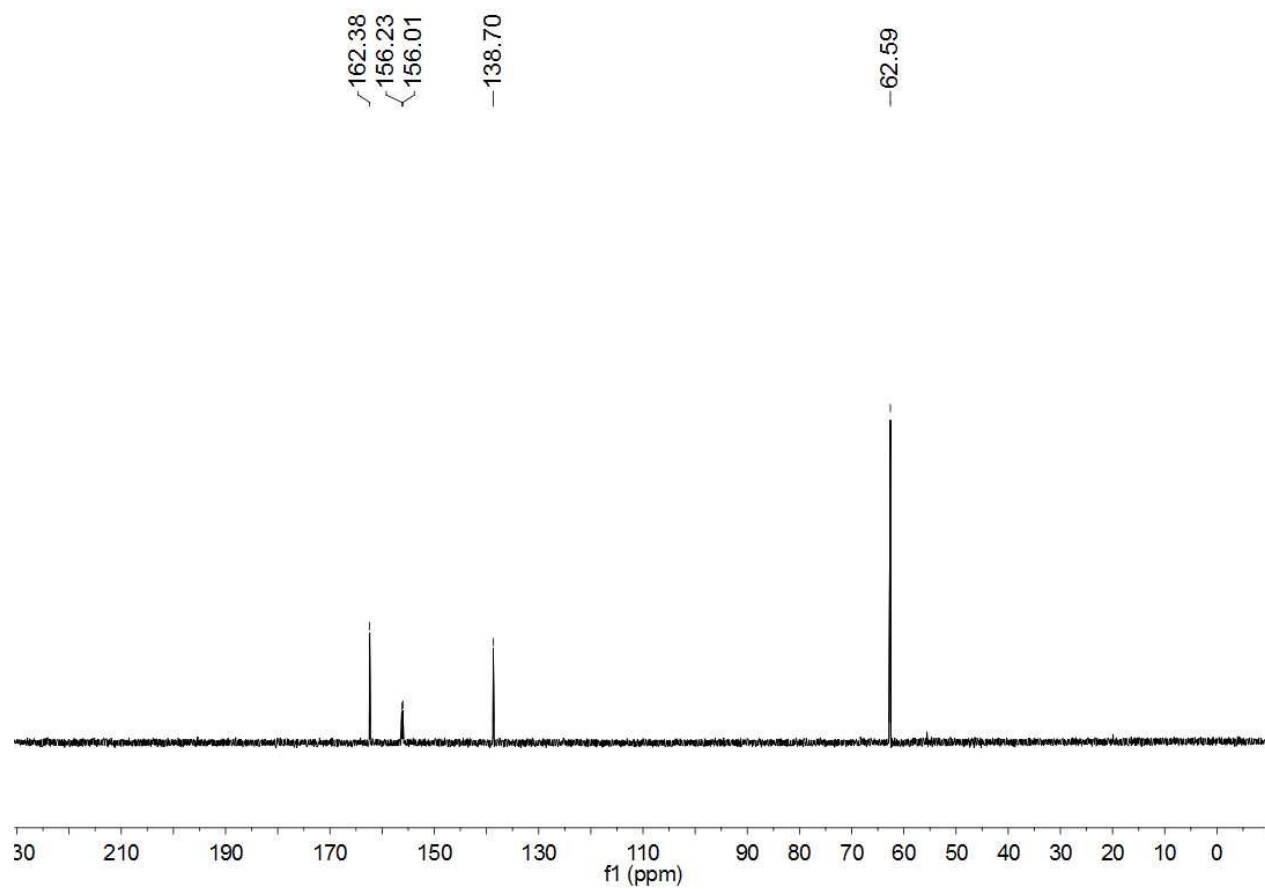

**Figure S6.**  $^{13}\text{C}$  NMR ( $\text{D}_2\text{O}$ , 125 MHz) data of compound **2e**.
